# Supplementary material for: Incidence of shoulder dislocations in the UK, 1995–2015: a population-based cohort study
Source: PubMed Central journal article supplement (PMC5695490; doi:10.1136/bmjopen-2017-016112), 2017-11-14
Supplement: bmjopen-2017-016112supp001.pdf [file bmjopen-2017-016112supp001.pdf]

**Supplementary table A:** Clinical Practice Research Datalink (CPRD) dataset dislocation READ codes used to identify shoulder dislocation patients

| <b>Description</b>                                                 | <b>CPRD READ Code</b> | <b>Numbers of patients</b> |
|--------------------------------------------------------------------|-----------------------|----------------------------|
| Dislocation or subluxation of shoulder                             | <b>S41..00</b>        | 9,600                      |
| Dislocation of shoulder NOS                                        | <b>S41z.00</b>        | 2,066                      |
| H/O: dislocated shoulder                                           | <b>14G5.00</b>        | 2,331                      |
| Closed reduction of dislocation of shoulder                        | <b>7K6G300</b>        | 739                        |
| Closed traumatic dislocation of shoulder                           | <b>S410.00</b>        | 410                        |
| Recurrent dislocation of shoulder – anterior                       | <b>N083A00</b>        | 646                        |
| Anterior dislocation of shoulder                                   | <b>S410111</b>        | 424                        |
| Recurrent joint dislocation, of shoulder region                    | <b>N083100</b>        | 176                        |
| Recurrent subluxation of shoulder – anterior                       | <b>N083C00</b>        | 168                        |
| Closed traumatic dislocation shoulder jnt. Anterior (sub-coracoid) | <b>S410100</b>        | 64                         |
| Closed traumatic dislocation shoulder joint, unspecified           | <b>S410000</b>        | 78                         |
| Closed traumatic subluxation, shoulder                             | <b>S412.00</b>        | 61                         |
| <b>Total</b>                                                       |                       | <b>16,763</b>              |
