# Supplementary material for: Incidence of shoulder dislocations in the UK, 1995–2015: a population-based cohort study
Source: PubMed Central journal article supplement (PMC5695490; doi:10.1136/bmjopen-2017-016112), 2017-11-14

## Validation Algorithm

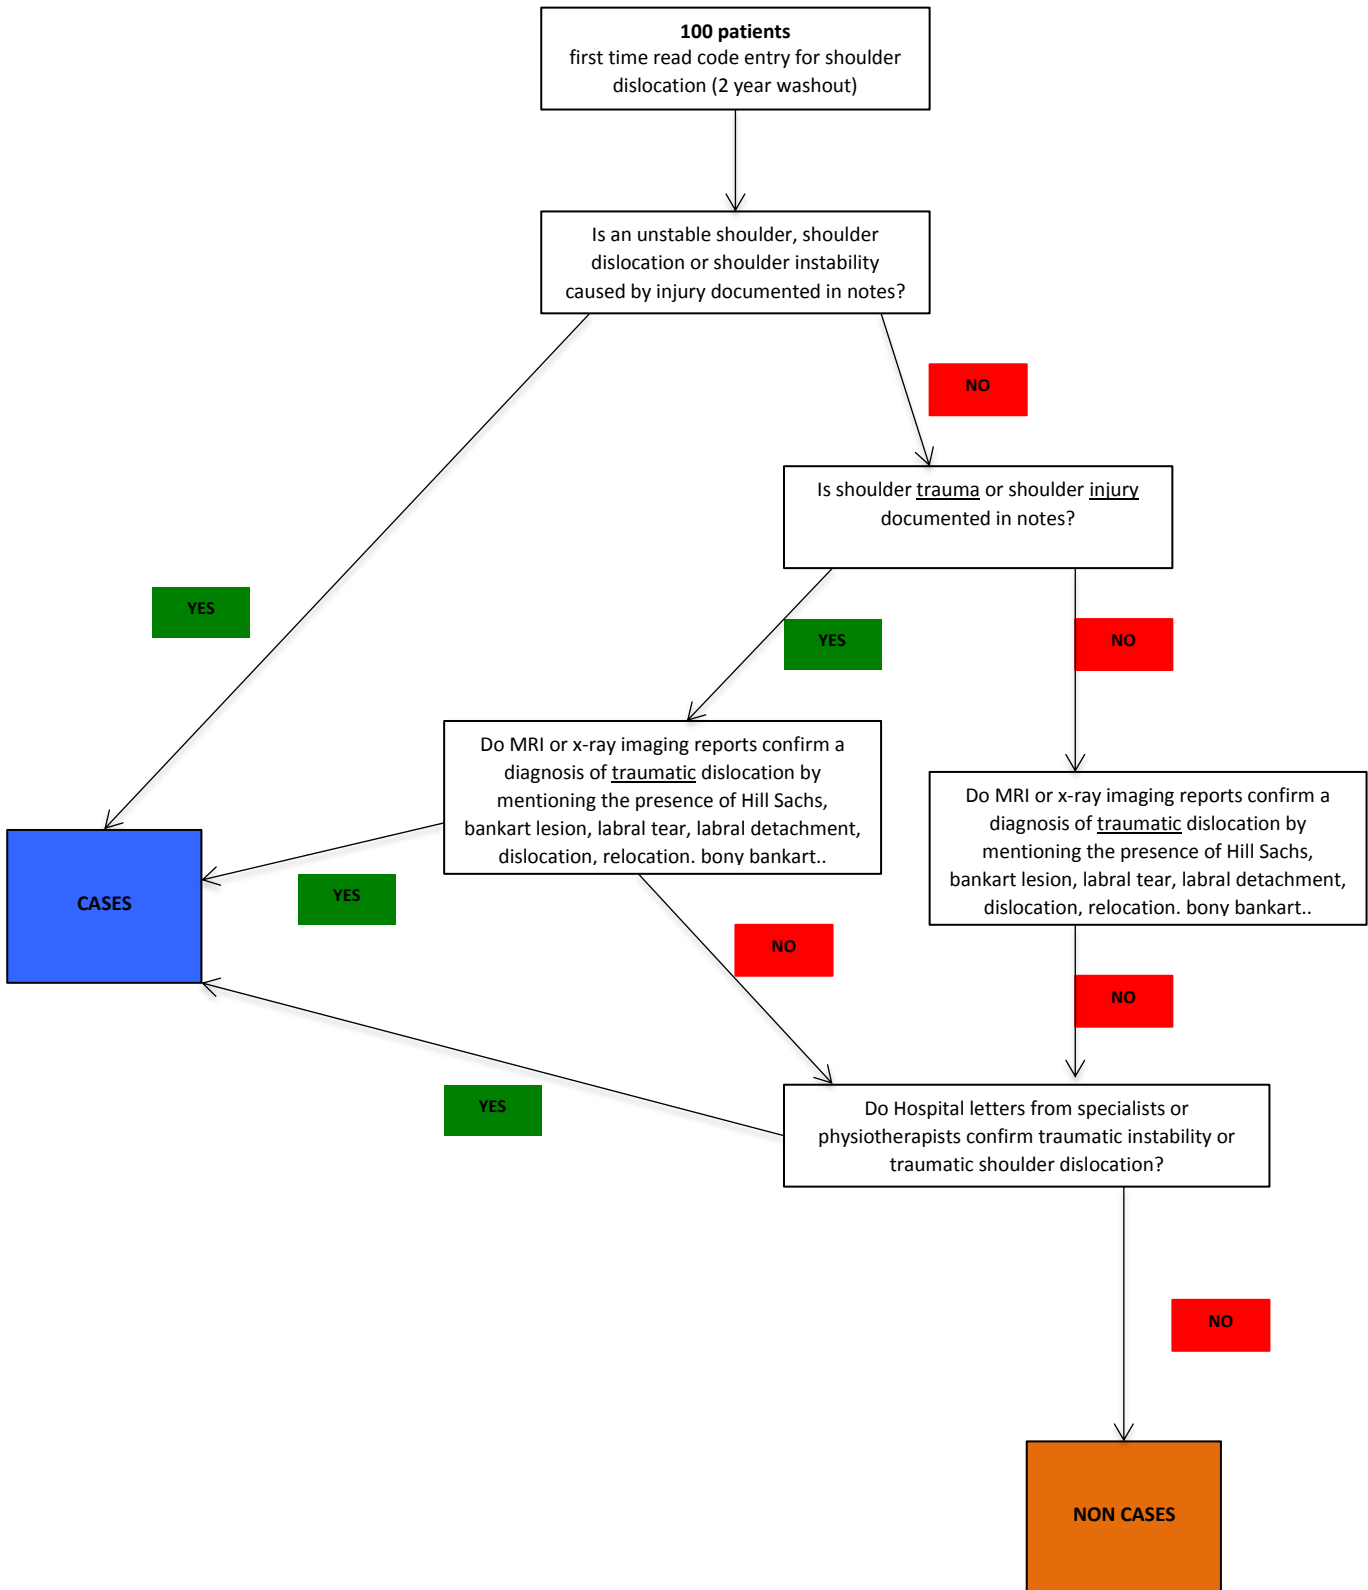

Supplement: bmjopen-2017-016112supp002.pdf [file bmjopen-2017-016112supp002.pdf]
